# Supplementary material
Source: PubMed Central journal article supplement (PMC2816612)
Supplement: ddp552_1.pdf [file ddp552_1.pdf]

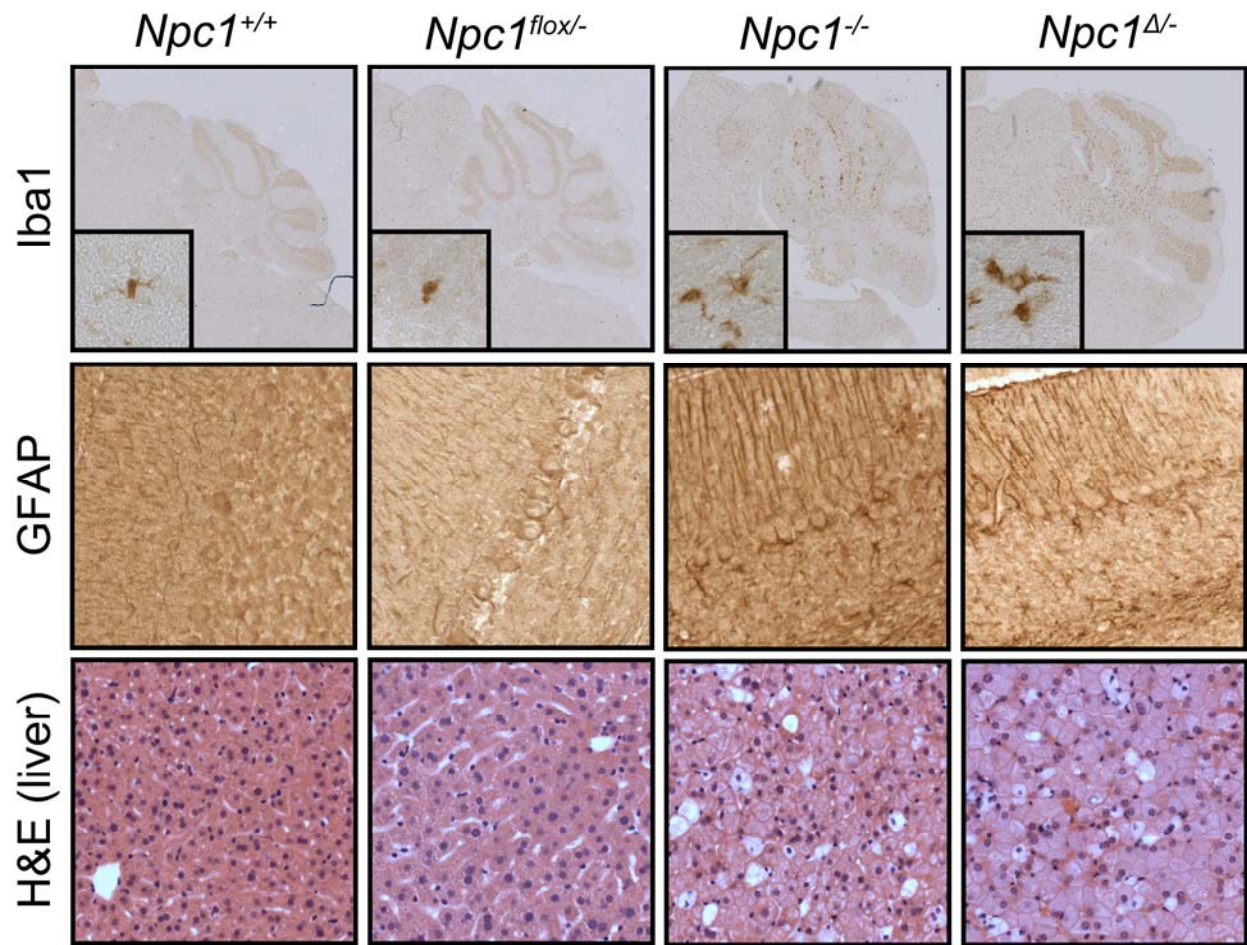

**Figure S1.** Pathology following germline deletion of *Npc1*. Immunohistochemical staining for markers of microglia (Iba1, top row) and astrocytes (GFAP, middle row) demonstrate gliosis in *Npc1*<sup>-/-</sup> and *Npc1*<sup>Δ/-</sup>, but not control cerebella. (Bottom row) H&E staining of liver tissue demonstrates foamy macrophages in *Npc1*<sup>-/-</sup> and *Npc1*<sup>Δ/-</sup> mice, but not controls.

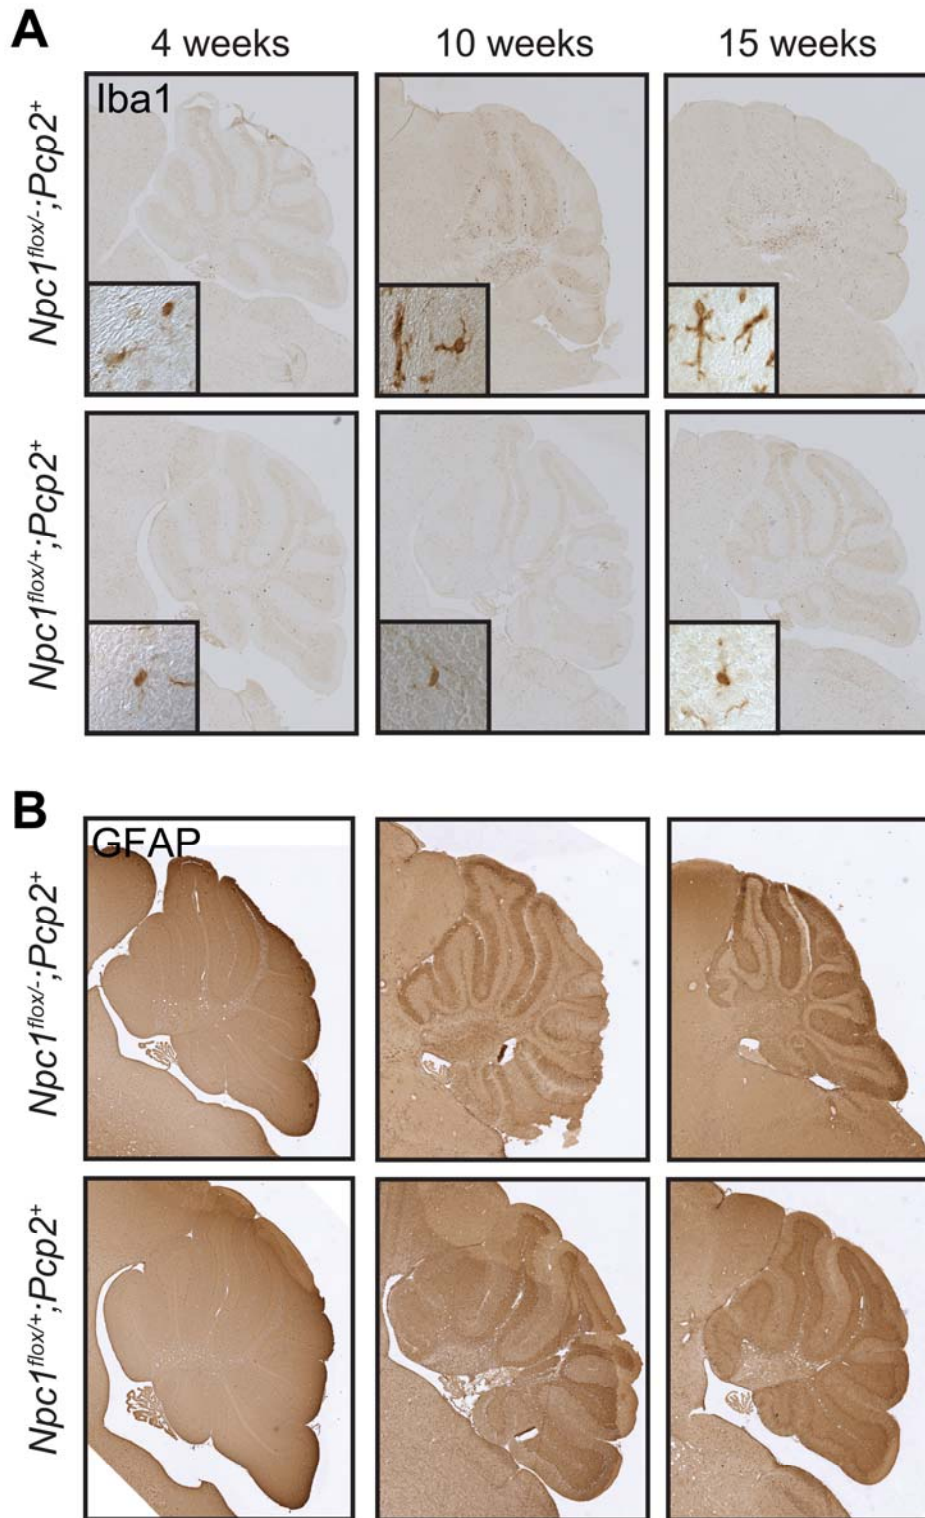

**Figure S2.** Reactive gliosis in Purkinje cell specific *Npc1* null mutants. **(A)** Staining for Iba1 reveals proliferation of microglia with activated morphology in *Npc1<sup>flox/-</sup>;Pcp2-Cre<sup>+</sup>* mice, but not controls. **(B)** Staining for GFAP reveals proliferation of astrocytes in the molecular layer of *Npc1<sup>flox/-</sup>;Pcp2-Cre<sup>+</sup>* mice, but not controls.
